# Supplementary material for: Crystallization of ZnO thin films without polymer substrate deformation via thermal dissipation annealing method for next generation wearable devices
Source: Royal Society of Chemistry journal article supplement (doi:10.1039/d0ra09869h), 2021-01-01
Supplement: d0ra09869h1.pdf [file d0ra09869h1.pdf]

## Electronic Supplementary Information

# **Crystallization of ZnO thin films without polymer substrate deformation via thermal dissipation annealing method for next generation wearable devices**

Dongwan Kim<sup>1</sup> and Jae-Young Leem<sup>1,\*</sup>

<sup>1</sup>Department of Nanoscience & Engineering, Inje University, 197, Inje-ro, Gimhae-si,  
Gyeongsangnam-do 621-749, Republic of Korea

\*Corresponding authors.

E-mail addresses: [jyleem@inje.ac.kr](mailto:jyleem@inje.ac.kr)

Tel.: +82-55-320-3716. Fax: +82-55-320-3631

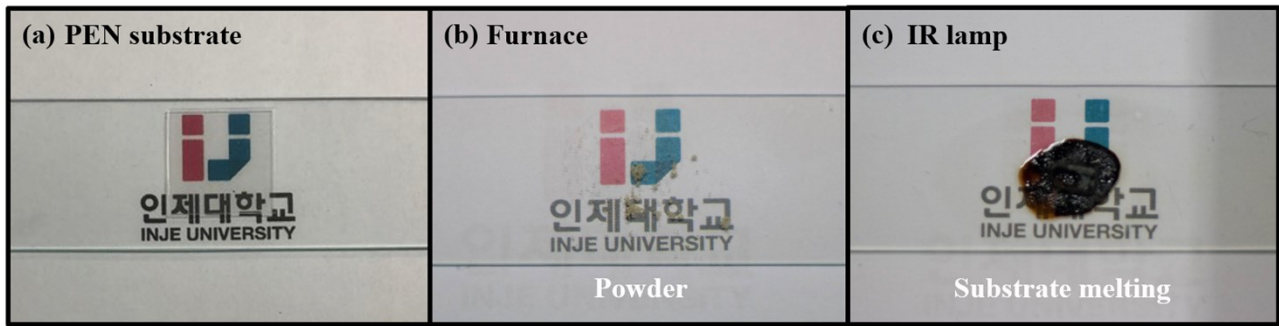

**Fig. S1.** Photographic image of (a) PEN substrate and sol-gel spin-coated ZnO thin films annealed by using (b) furnace and (c) IR lamp without dissipation system.
